# Supplementary material
Source: PubMed Central journal article supplement (PMC11249855)
Supplement: ajcei0013-0068-f7.pdf [file ajcei0013-0068-f7.pdf]

## Anti-inflammatory effects of whole-body vibration

**Table S1.** Quality assessment of the included studies based on the PEDro scale

| Study              | Year | Eligibility criteria | Random allocation | Concealed allocation | Baseline comparability | Masked participants | Masked therapists | Masked assessors | Adequate follow-up | Intention to treat analysis | Between-group statistical comparison | Point estimates and variability | Total score |
|--------------------|------|----------------------|-------------------|----------------------|------------------------|---------------------|-------------------|------------------|--------------------|-----------------------------|--------------------------------------|---------------------------------|-------------|
| Jiang D            | 2021 | *                    | *                 | *                    | *                      |                     |                   |                  | *                  |                             | *                                    | *                               | 7           |
| Kerr N             | 2022 | *                    | *                 | *                    | *                      |                     |                   |                  |                    |                             | *                                    | *                               | 6           |
| Yu PM              | 2021 | *                    | *                 |                      |                        |                     |                   |                  | *                  |                             | *                                    | *                               | 5           |
| Sun C              | 2015 | *                    | *                 | *                    | *                      |                     |                   |                  | *                  |                             | *                                    | *                               | 7           |
| Pawlak M           | 2013 | *                    | *                 | *                    | *                      |                     |                   |                  | *                  |                             | *                                    | *                               | 7           |
| Wang H             | 2023 | *                    | *                 |                      | *                      |                     |                   |                  |                    |                             | *                                    | *                               | 5           |
| Wang L             | 2020 | *                    | *                 | *                    | *                      |                     |                   |                  | *                  |                             | *                                    | *                               | 7           |
| Tsai SH            | 2022 | *                    | *                 | *                    | *                      |                     |                   |                  | *                  |                             | *                                    | *                               | 7           |
| Wu H               | 2018 | *                    | *                 | *                    | *                      |                     |                   |                  | *                  |                             | *                                    | *                               | 7           |
| Koczulla AR        | 2020 | *                    | *                 | *                    |                        |                     |                   |                  |                    |                             | *                                    | *                               | 6           |
| Lage VKS           | 2018 | *                    |                   |                      | *                      |                     |                   |                  |                    |                             | *                                    | *                               | 4           |
| Sanni AA           | 2022 | *                    | *                 | *                    | *                      |                     |                   |                  |                    |                             | *                                    | *                               | 6           |
| Bellia A           | 2014 | *                    | *                 | *                    | *                      |                     |                   |                  | *                  |                             | *                                    | *                               | 7           |
| Cristi C           | 2014 | *                    |                   |                      | *                      |                     |                   |                  | *                  |                             | *                                    | *                               | 5           |
| Simão AP           | 2012 | *                    | *                 | *                    | *                      |                     |                   |                  | *                  |                             | *                                    | *                               | 7           |
| Ribeiro VGC        | 2018 | *                    |                   |                      | *                      |                     |                   |                  | *                  |                             | *                                    | *                               | 5           |
| Neves CDC          | 2018 | *                    |                   |                      | *                      |                     |                   | *                | *                  |                             | *                                    | *                               | 6           |
| Jawed Y            | 2020 | *                    |                   |                      | *                      |                     |                   |                  | *                  |                             | *                                    | *                               | 5           |
| Naghii MR          | 2011 | *                    | *                 | *                    | *                      |                     |                   |                  | *                  |                             | *                                    | *                               | 7           |
| Hazell TJ          | 2014 | *                    |                   |                      | *                      |                     |                   |                  | *                  |                             | *                                    | *                               | 5           |
| Wunram H           | 2021 | *                    | *                 | *                    | *                      |                     |                   |                  | *                  | *                           | *                                    | *                               | 8           |
| Di Giminiani R     | 2020 | *                    | *                 | *                    | *                      |                     |                   |                  |                    |                             | *                                    | *                               | 6           |
| Seefried L         | 2017 | *                    |                   |                      | *                      |                     |                   |                  | *                  |                             | *                                    | *                               | 5           |
| McCann MR          | 2015 | *                    | *                 | *                    | *                      |                     |                   |                  | *                  |                             | *                                    | *                               | 7           |
| Rodriguez-Miguel P | 2021 | *                    | *                 | *                    | *                      |                     |                   |                  | *                  |                             | *                                    | *                               | 7           |
| Wano N             | 2020 | *                    | *                 | *                    | *                      |                     |                   |                  |                    |                             | *                                    | *                               | 6           |
| Chen T             | 2019 | *                    | *                 | *                    | *                      |                     |                   |                  |                    |                             | *                                    | *                               | 6           |
| Chow SK            | 2023 | *                    | *                 | *                    | *                      |                     |                   |                  | *                  |                             | *                                    | *                               | 7           |
| Shehata MM         | 2019 | *                    | *                 | *                    | *                      |                     |                   |                  | *                  |                             | *                                    | *                               | 7           |
| Oh S               | 2014 | *                    |                   |                      | *                      |                     |                   |                  | *                  |                             | *                                    | *                               | 5           |
| Weinheimer-Haus EM | 2014 | *                    | *                 | *                    | *                      |                     |                   |                  |                    |                             | *                                    | *                               | 6           |
